# Supplementary material for: Solar-powered oxygen delivery for the treatment of children with hypoxemia: protocol for a cluster-randomized stepped-wedge controlled trial in Uganda
Source: Trials. 2019 Dec 5;20:679. doi: 10.1186/s13063-019-3752-2 (PMC6896330; doi:10.1186/s13063-019-3752-2)
Supplement: Supplementary file 1 — Additional file 1. World Health Organization Trial Registration Data Set. [file 13063_2019_3752_MOESM1_ESM.pdf]

**WORLD HEALTH ORGANIZATION TRIAL REGISTRATION DATA SET**

| <b>DATA CATEGORY</b>                                 | <b>INFORMATION</b>                                                                                                                                                                                                                                                                                                                                                                                                   |
|------------------------------------------------------|----------------------------------------------------------------------------------------------------------------------------------------------------------------------------------------------------------------------------------------------------------------------------------------------------------------------------------------------------------------------------------------------------------------------|
| <b>Primary registry and trial identifying number</b> | ClinicalTrials.gov<br>NCT03851783                                                                                                                                                                                                                                                                                                                                                                                    |
| <b>Date of registration in primary registry</b>      | February 22, 2019                                                                                                                                                                                                                                                                                                                                                                                                    |
| <b>Secondary identifying numbers</b>                 | Grand Challenges Canada: 1909-27795<br>Women and Children's Health Research Institute: WCHSSLDRP 2371                                                                                                                                                                                                                                                                                                                |
| <b>Source(s) of monetary or material support</b>     | Grand Challenges Canada<br>Women and Children's Health Research Institute                                                                                                                                                                                                                                                                                                                                            |
| <b>Primary sponsor</b>                               | Dr. Michael Hawkes (Investigator Initiated Study)                                                                                                                                                                                                                                                                                                                                                                    |
| <b>Secondary sponsor(s)</b>                          | <ul style="list-style-type: none"> <li>– University of Alberta</li> <li>– Makerere University</li> <li>– Ministry of Health Uganda</li> </ul>                                                                                                                                                                                                                                                                        |
| <b>Contact for public queries</b>                    | Dr. Michael Hawkes; Telephone (+17802485540); Email ( <a href="mailto:mthawkes@ualberta.ca">mthawkes@ualberta.ca</a> ), 3-588 Edmonton Clinic Health Academy, Faculty of Medicine, University of Alberta, Edmonton, Alberta, Canada                                                                                                                                                                                  |
| <b>Contact for scientific queries</b>                | Dr. Michael Hawkes; Telephone (+17802485540); Email ( <a href="mailto:mthawkes@ualberta.ca">mthawkes@ualberta.ca</a> ), 3-588 Edmonton Clinic Health Academy, Faculty of Medicine, University of Alberta, Edmonton, Alberta, Canada                                                                                                                                                                                  |
| <b>Public title</b>                                  | Effect of Solar Powered Oxygen Delivery on Childhood Mortality in Uganda                                                                                                                                                                                                                                                                                                                                             |
| <b>Scientific title</b>                              | Effect of Solar Powered Oxygen Delivery on Childhood Mortality in Uganda: a cluster randomized trial                                                                                                                                                                                                                                                                                                                 |
| <b>Countries of recruitment</b>                      | Uganda                                                                                                                                                                                                                                                                                                                                                                                                               |
| <b>Health condition(s) or problem(s) studied</b>     | Pneumonia, hypoxemia                                                                                                                                                                                                                                                                                                                                                                                                 |
| <b>Intervention(s)</b>                               | <u>Intervention:</u> Solar Powered Oxygen - Our system provides medical-grade oxygen to pediatric patients with hypoxemia, utilizing solar energy to power an oxygen concentrator to deliver therapeutic oxygen. An array of photovoltaic cells regulated by a charge controller, generates electricity, and charges a battery bank. A DC→AC inverter then provides power to the oxygen concentrator, which utilizes |

| DATA CATEGORY                        | INFORMATION                                                                                                                                                                                                                                                                                                                                                                                                                                                                                                                                                                                                                                                                                                                                                                                                                                                                                                                                                                                                                                                                                                                                                                                                                                                                                                     |
|--------------------------------------|-----------------------------------------------------------------------------------------------------------------------------------------------------------------------------------------------------------------------------------------------------------------------------------------------------------------------------------------------------------------------------------------------------------------------------------------------------------------------------------------------------------------------------------------------------------------------------------------------------------------------------------------------------------------------------------------------------------------------------------------------------------------------------------------------------------------------------------------------------------------------------------------------------------------------------------------------------------------------------------------------------------------------------------------------------------------------------------------------------------------------------------------------------------------------------------------------------------------------------------------------------------------------------------------------------------------|
|                                      | <p>pressure swing absorption technology to concentrate medical-grade oxygen from ambient air.</p> <p><u>Control:</u> Selected sites yet to implement the solar powered oxygen delivery system.</p>                                                                                                                                                                                                                                                                                                                                                                                                                                                                                                                                                                                                                                                                                                                                                                                                                                                                                                                                                                                                                                                                                                              |
| Key inclusion and exclusion criteria | <p><u>Inclusion Criteria (Hospital – Site Selection):</u></p> <ul style="list-style-type: none"> <li>– Pediatric inpatient services</li> <li>– Lack of consistent oxygen supply on pediatric ward</li> <li>– Adequate space and willingness to install solar panels, battery bank, and concentrator on the hospital premises (pediatric ward).</li> </ul> <p><u>Exclusion Criteria (Hospital – Site Selection):</u></p> <ul style="list-style-type: none"> <li>– No inpatient services for children</li> <li>– Pre-existing, functional, consistent oxygen delivery system (cylinders or concentrator)</li> <li>– No space or unwilling to install solar panels, battery bank, and concentrator</li> </ul> <p><u>Inclusion Criteria (Patients):</u></p> <ul style="list-style-type: none"> <li>– Age &lt; 5 years</li> <li>– Hypoxemia (SpO<sub>2</sub> &lt; 92%) based on non-invasive pulse oximetry</li> <li>– Hospital admission warranted based on clinical judgement</li> </ul> <p><u>Exclusion Criteria (Patients):</u></p> <ul style="list-style-type: none"> <li>– SpO<sub>2</sub> ≥ 92%</li> <li>– Outpatient management</li> <li>– Denial of consent to participate in study</li> <li>– Known cyanotic cardiac condition</li> <li>– Neonatal diagnosis of hypoxic ischemic encephalopathy</li> </ul> |
| Study type                           | <p><u>Type:</u> Interventional</p> <p><u>Allocation:</u> Cluster Randomized</p> <p><u>Intervention Model:</u> Stepped Wedge</p> <p><u>Masking:</u> None</p> <p><u>Primary purpose:</u> Prevention</p>                                                                                                                                                                                                                                                                                                                                                                                                                                                                                                                                                                                                                                                                                                                                                                                                                                                                                                                                                                                                                                                                                                           |
| Date of first enrolment              | June 1, 2019                                                                                                                                                                                                                                                                                                                                                                                                                                                                                                                                                                                                                                                                                                                                                                                                                                                                                                                                                                                                                                                                                                                                                                                                                                                                                                    |
| Target sample size                   | <p><u>Health Facility Sites:</u> 20</p> <p><u>Patient Participants:</u> 2,400</p>                                                                                                                                                                                                                                                                                                                                                                                                                                                                                                                                                                                                                                                                                                                                                                                                                                                                                                                                                                                                                                                                                                                                                                                                                               |
| Recruitment status                   | Pending                                                                                                                                                                                                                                                                                                                                                                                                                                                                                                                                                                                                                                                                                                                                                                                                                                                                                                                                                                                                                                                                                                                                                                                                                                                                                                         |
| Primary outcome(s)                   | Mortality at 48 hours after admission                                                                                                                                                                                                                                                                                                                                                                                                                                                                                                                                                                                                                                                                                                                                                                                                                                                                                                                                                                                                                                                                                                                                                                                                                                                                           |
| Key secondary outcomes               | In-hospital mortality, time of death                                                                                                                                                                                                                                                                                                                                                                                                                                                                                                                                                                                                                                                                                                                                                                                                                                                                                                                                                                                                                                                                                                                                                                                                                                                                            |

| DATA CATEGORY                | INFORMATION                                                                                                                                                                                                                                                                                                                                                                                                                                                                                                                                                                                                                                      |
|------------------------------|--------------------------------------------------------------------------------------------------------------------------------------------------------------------------------------------------------------------------------------------------------------------------------------------------------------------------------------------------------------------------------------------------------------------------------------------------------------------------------------------------------------------------------------------------------------------------------------------------------------------------------------------------|
|                              | Length of hospital stay<br>Duration of supplemental oxygen therapy (time to wean O <sub>2</sub> )<br>Oxygen delivery system failure<br>Costs (installation, servicing, maintenance)<br>Nursing skills, baseline and skills retention                                                                                                                                                                                                                                                                                                                                                                                                             |
| <b>Ethics Review</b>         | Institutional Review Board of the University of Alberta: Approve – February 25, 2019; Telephone (+17804920459); Email ( <a href="mailto:reoffice@ualberta.ca">reoffice@ualberta.ca</a> )<br>Biomedical Sciences Research and Ethics Committee of Makerere University: Approved – March 5, 2019; Telephone (+256 75 25 75 050); Email ( <a href="mailto:irbbiomedicalsciences@gmail.com">irbbiomedicalsciences@gmail.com</a> )                                                                                                                                                                                                                    |
| <b>Completion date</b>       | May 31, 2021                                                                                                                                                                                                                                                                                                                                                                                                                                                                                                                                                                                                                                     |
| <b>Summary Results</b>       | Not yet enrolled                                                                                                                                                                                                                                                                                                                                                                                                                                                                                                                                                                                                                                 |
| <b>IPD Sharing Statement</b> | De-identified individual clinical trial participant level data (IPD) will be shared upon reasonable request submitted to the corresponding author.<br>Findings will be disseminated through presentations at international conferences, and will be published in open access peer-reviewed journals for broad readership and to ensure that the data are available to health workers in low-middle income countries.<br>At the conclusion of the study, we will hold a “town hall” meeting at participating health facilities, where local and global study data will be shared with the community members, with opportunities to ask questions. |
